# Supplementary material
Source: Springer Nature journal article supplement (https://www.springermedizin.de/resource/supplementary/13049_2011_290_MOESM3_ESM.pdf/9666272)

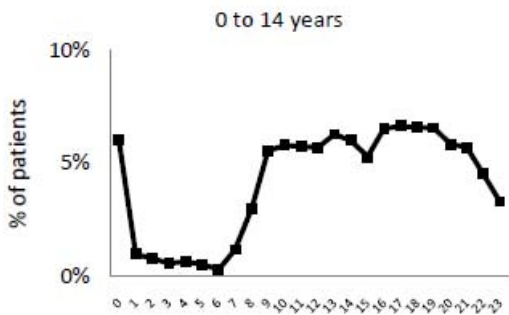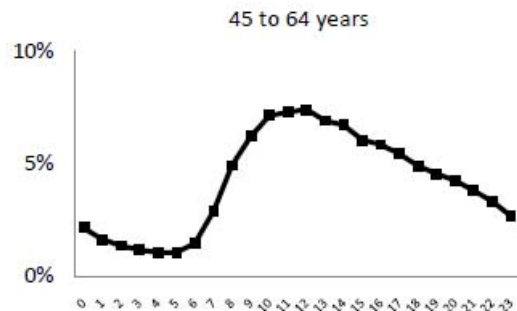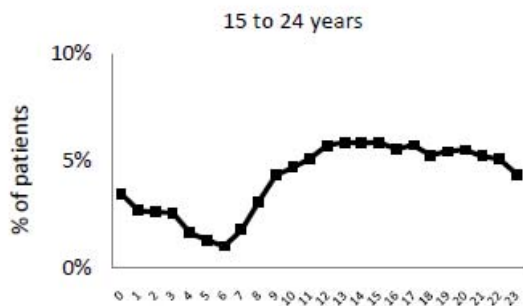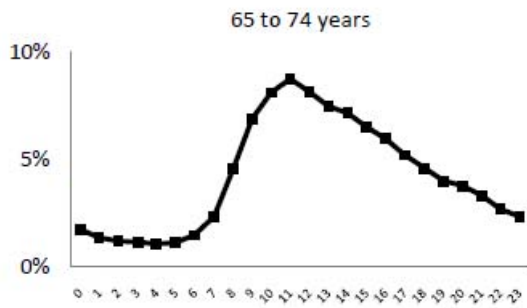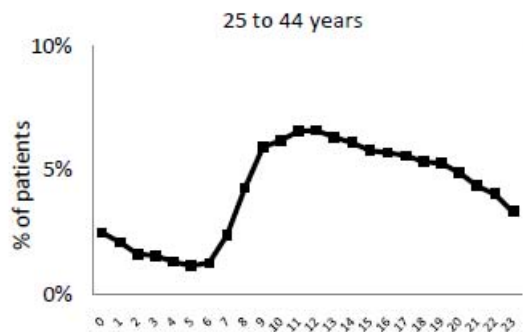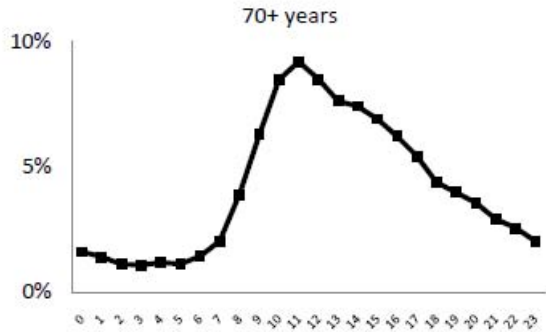

Time of presentation

Time of presentation

Supplement: MOESM3 [file 9666272]
